# Supplementary material for: Modulating the deep-level defects and charge extraction for efficient perovskite solar cells with high fill factor over 86%
Source: Royal Society of Chemistry journal article supplement (doi:10.1039/d2ee02543d), 2022-01-01
Supplement: d2ee02543d1.pdf [file d2ee02543d1.pdf]

Electronic Supplementary Information (ESI) for

**Modulating the deep-level defects and charge extraction for  
efficient perovskite solar cells with high fill factor over 86%**

Xingcheng Li,<sup>‡a</sup> Xin Wu,<sup>‡b</sup> Bo Li,<sup>‡b</sup> Zeyan Cen,<sup>a</sup> Yanbo Shang,<sup>a</sup> Weitao Lian,<sup>a</sup> Rui  
Cao,<sup>a</sup> Lingbo Jia,<sup>a</sup> Zhen Li,<sup>b</sup> Danpeng Gao,<sup>b</sup> Xiaofen Jiang,<sup>a</sup> Tao Chen,<sup>a</sup> Yalin Lu,<sup>a</sup>  
Zonglong Zhu<sup>\*bc</sup> and Shangfeng Yang<sup>\*a</sup>

---

<sup>a</sup> CAS Key Laboratory of Materials for Energy Conversion, Anhui Laboratory of Advanced Photon Science and Technology, Department of Materials Science and Engineering, University of Science and Technology of China, Hefei 230026, China. Email: sfyang@ustc.edu.cn

<sup>b</sup> Department of Chemistry, City University of Hong Kong, Kowloon, Hong Kong, China. Email: zonglzhu@cityu.edu.hk

<sup>c</sup> Hong Kong Institute for Clean Energy, City University of Hong Kong, Kowloon 999077, Hong Kong, China

<sup>‡</sup> These authors contributed equally.

---

## Contents

|                                                                                                                                          |    |
|------------------------------------------------------------------------------------------------------------------------------------------|----|
| S1. Incorporation and uniformity of Cs and Br elements within CsPbBr <sub>3</sub> -incorporated FAPbI <sub>3</sub> perovskite film. .... | 3  |
| S2. Statistics of device performance. ....                                                                                               | 6  |
| S3. Comparison of FF and PCE obtained in this work with those reported in literatures. ....                                              | 13 |
| S4. Stability data.....                                                                                                                  | 15 |
| S5. XRD patterns of FAPbI <sub>3</sub> films with different amounts of CsPbBr <sub>3</sub> .....                                         | 17 |
| S6. Geometric illustration of the crystal structure and radially integrated curves extracted from GIXRD patterns. ....                   | 20 |
| S7. SEM images of FAPbI <sub>3</sub> and 1.0 mol% CsPbBr <sub>3</sub> -FAPbI <sub>3</sub> perovskite films. ....                         | 21 |
| S8. TAS at different delay times. ....                                                                                                   | 23 |
| S9. UV-vis spectra and the plots of $(\alpha hv)^2$ vs energy (hv) of the control and target perovskite films.....                       | 24 |
| S10. Enlarged DLTS spectra and Arrhenius plot. ....                                                                                      | 25 |
| S11. SCLC analysis. ....                                                                                                                 | 27 |
| S12. EIS analysis.....                                                                                                                   | 29 |
| S13. Dark $J-V$ curves of the control and target devices.....                                                                            | 31 |
| S14. FF loss analysis.....                                                                                                               | 31 |
| References .....                                                                                                                         | 34 |

---

**S1. Incorporation and uniformity of Cs and Br elements within CsPbBr<sub>3</sub>-incorporated FAPbI<sub>3</sub> perovskite film.**

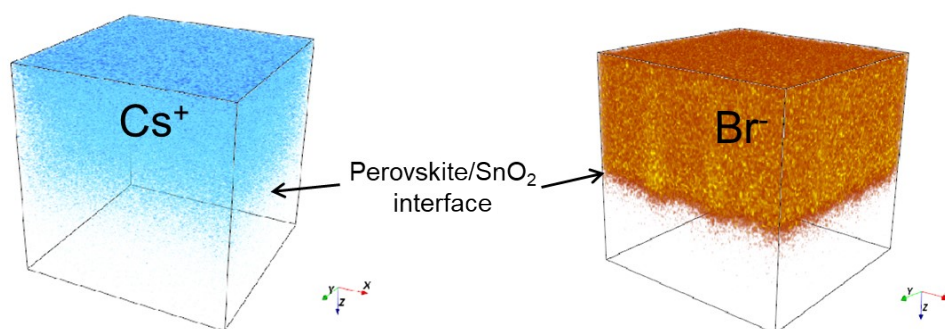

**Fig. S1** Time-of-flight secondary ion mass spectrometry of Cs<sup>+</sup> and Br<sup>-</sup> results of FTO/SnO<sub>2</sub>/KCl/1.0 mol% CsPbBr<sub>3</sub>-FAPbI<sub>3</sub> perovskite (target).

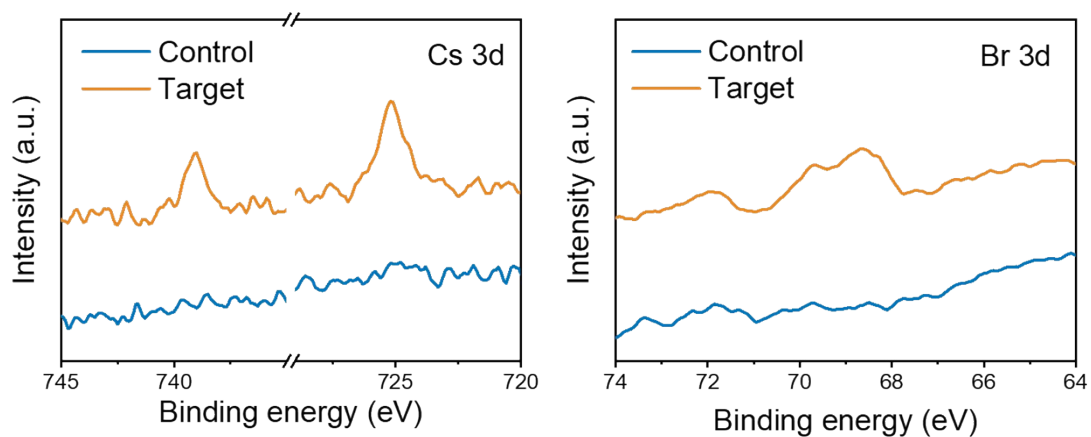

**Fig. S2** X-ray photoelectron spectroscopy (XPS) of the control and target perovskite films.

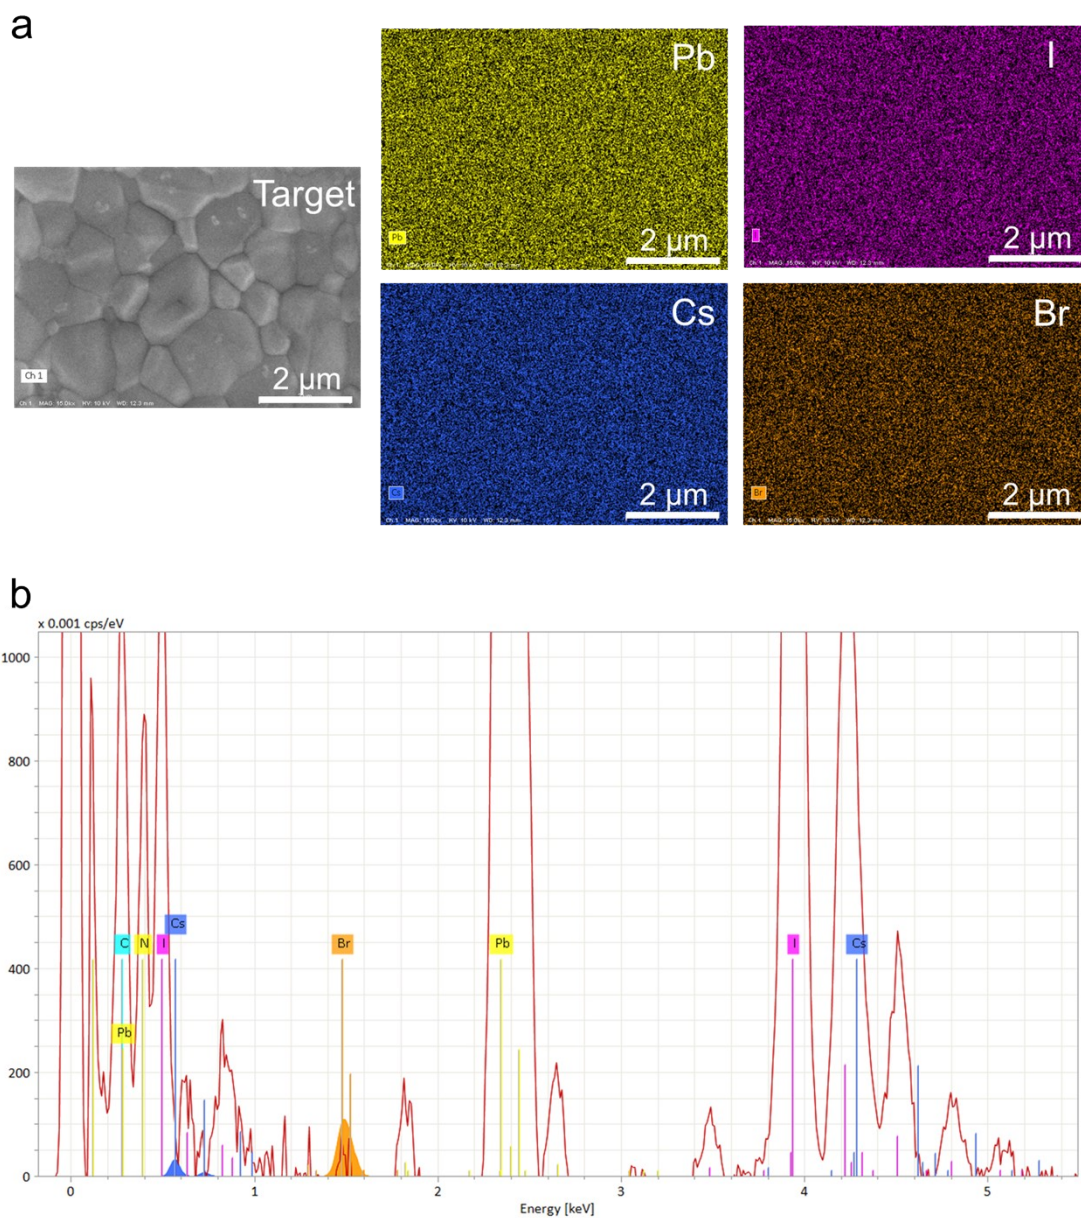

**Fig. S3** The top-view SEM image and energy dispersive X-ray (EDX) mapping of the 1.0 mol% CsPbBr<sub>3</sub>-FAPbI<sub>3</sub> (target) perovskite film.

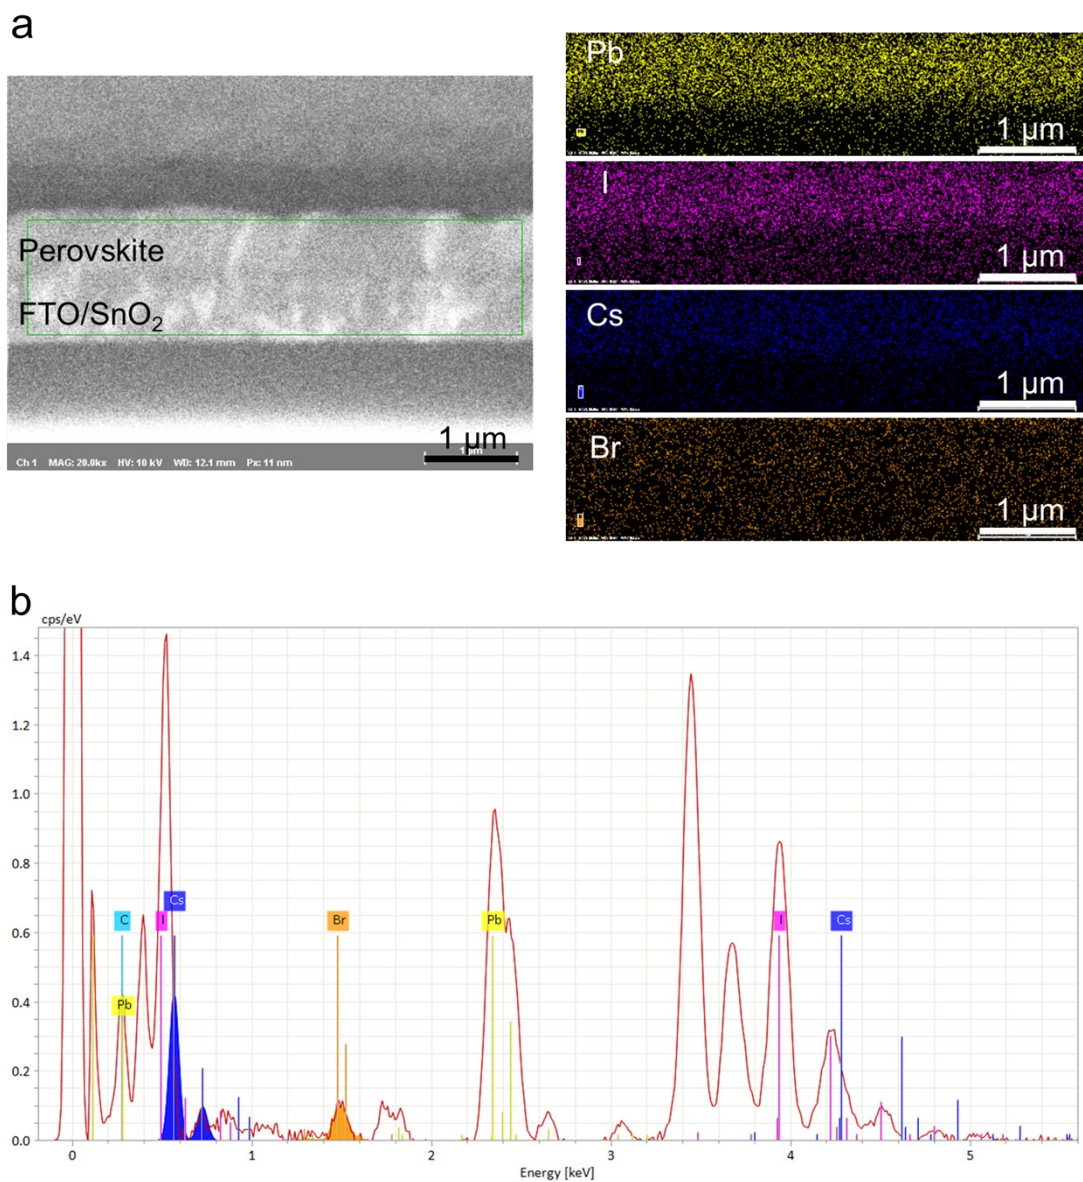

**Fig. S4** The cross-sectional SEM image and energy dispersive X-ray (EDX) mapping of the 1.0 mol% CsPbBr<sub>3</sub>-FAPbI<sub>3</sub> (target) perovskite film.

---

## S2. Statistics of device performance.

**Table S1** Photovoltaic parameters of perovskite solar cells fabricated with different amounts of CsPbBr<sub>3</sub> measured under one sun illumination (AM 1.5G, 100 mA cm<sup>-2</sup>).

---

| Molar ratio <sup>a</sup> | $V_{OC}^b$ (V) | $J_{SC}^b$ (mA cm <sup>-2</sup> ) | FF <sup>b</sup> (%) | PCE <sup>b</sup> (%) |
|--------------------------|----------------|-----------------------------------|---------------------|----------------------|
| 0%                       | 1.089±0.009    | 25.63±0.15                        | 82.59±0.72          | 23.05±0.21           |
| 0.5%                     | 1.111±0.006    | 25.52±0.24                        | 85.41±0.38          | 24.21±0.26           |
| 1.0%                     | 1.131±0.008    | 25.46±0.17                        | 85.78±0.40          | 24.71±0.19           |
| 2.0%                     | 1.136±0.007    | 25.39±0.22                        | 84.92±0.80          | 24.49±0.25           |

---

<sup>a</sup> The molar ratio of CsPbBr<sub>3</sub> relative to PbI<sub>2</sub> in the perovskite precursor solution.

<sup>b</sup> Averaged 30 devices fabricated independently.

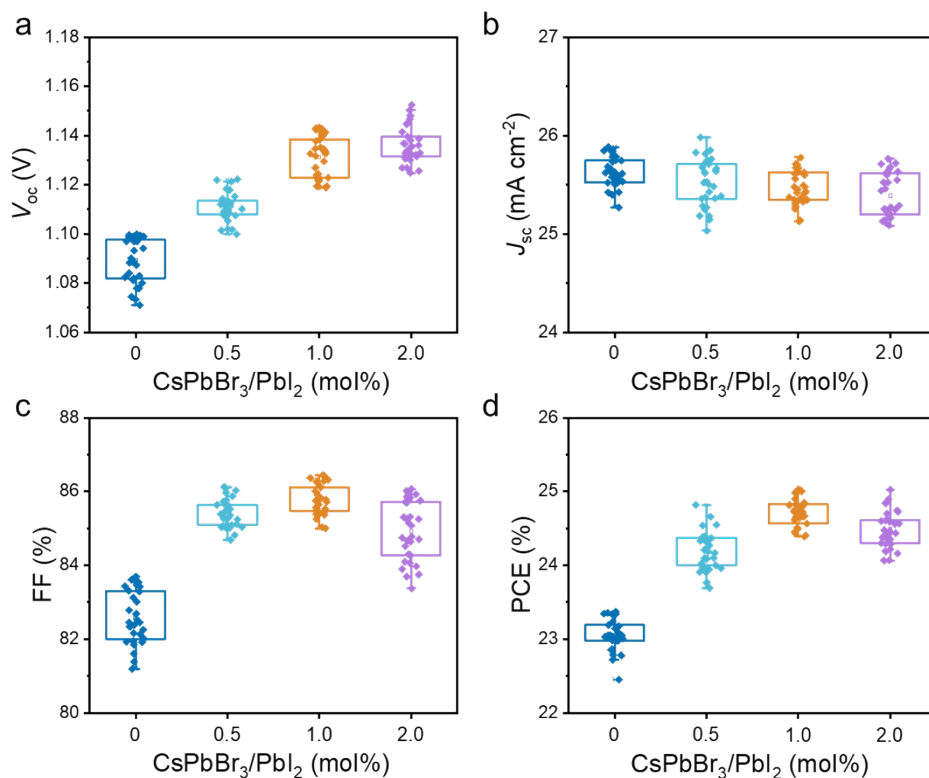

**Fig. S5** Device statistics for  $V_{OC}$  **a**,  $J_{SC}$  **b**, and FF **c** and PCE **d** for the devices with different amounts of CsPbBr<sub>3</sub>.

**Table S2** Photovoltaic parameters of the devices without and with pre-crystallized CsPbBr<sub>3</sub> and PbBr<sub>2</sub>/CsBr powder, respectively.

| Additive                                      | $V_{OC}^a$ (V) | $J_{SC}^a$ (mA cm <sup>-2</sup> ) | $FF^a$ (%) | $PCE^a$ (%) |
|-----------------------------------------------|----------------|-----------------------------------|------------|-------------|
| w/o                                           | 1.074±0.011    | 25.60±0.28                        | 83.73±0.96 | 23.02±0.29  |
| 1.0 mol% CsPbBr <sub>3</sub>                  | 1.129±0.004    | 25.54±0.13                        | 85.60±0.60 | 24.69±0.11  |
| 1.0 mol% PbBr <sub>2</sub> <sup>b</sup> +CsBr | 1.107±0.007    | 25.57±0.24                        | 84.19±0.98 | 23.83±0.31  |
| 1.0 mol% PbBr <sub>2</sub> <sup>c</sup> +CsBr | 1.121±0.005    | 25.56±0.25                        | 84.76±0.84 | 24.28±0.29  |

<sup>a</sup> Averaged 10 devices fabricated independently.

<sup>b</sup> The same to the PbBr<sub>2</sub> used to synthesize CsPbBr<sub>3</sub> crystal.

<sup>c</sup> High purity PbBr<sub>2</sub> (Alfa Aesar, 99.999%).



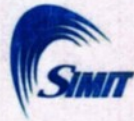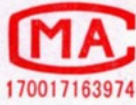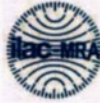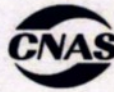

中国认可  
国际互认  
检测  
TESTING  
CNAS L8490

Test and Calibration Center of New Energy Device and Module,  
Shanghai Institute of Microsystem and Information Technology,  
Chinese Academy of Sciences (SIMIT)  
235, Chengbei Road, Jiading, Shanghai, China

## Measurement Report

**Client Name** University of Science and Technology of China (USTC)  
**Client Address** 96 Jinzhai Road, Hefei, Anhui Province, P.R.China  
**Sample** Perovskite solar cell  
**Manufacturer** USTC, Shangfeng Yang Group  
**Application** SIMITL72021102501  
**Measurement Date** 25<sup>th</sup> October, 2021

**Performed by:**

*Qiang Shi*  
Qiang Shi

**Date:**

25/10/2021

**Reviewed by:**

*Yating Zhang*  
Yating Zhang

25/10/2021

**Approved by:**

*Zhengxin Liu*  
Zhengxin Liu

Oct. 25. 2021

The measurement report without signature and seal are not valid. This report shall not be reproduced, except in full, without the approval of SIMIT.

Report No.21TR102501

1/5



| Sample Information      |                              |
|-------------------------|------------------------------|
| Sample Type             | Perovskite solar cell        |
| Quantity                | 1                            |
| Serial No.              | 39-2#                        |
| Measurement Item        | I-V characteristic           |
| Measurement Environment | 23.9 ± 2.0°C, 41.5 ± 5.0%R.H |

| Measurement of I-V characteristic                        |                                                                                                                                                         |
|----------------------------------------------------------|---------------------------------------------------------------------------------------------------------------------------------------------------------|
| Reference cell                                           | PVM1124                                                                                                                                                 |
| Reference cell Type                                      | mono-Si, WPVS, calibrated by NREL (ISO 2045)                                                                                                            |
| Calibration Value/Date of Calibration for Reference cell | 144.9mA/ Aug. 2021                                                                                                                                      |
| Measurement Conditions                                   | STC, linear sweep based on IEC 60904-1:2006                                                                                                             |
| Measurement Equipment/ Date of Calibration               | Steady State Solar Simulator (YSS-T155-2M) / May.2021<br>IV test system (ADCMT 6246) / April. 2021<br>SR Measurement system (CEP-25ML-CAS) / April.2021 |
| Mismatch Factor                                          | SMM=0.997514                                                                                                                                            |

| Serial Number | Scan Mode  | Area <sup>*(da)</sup> (cm <sup>2</sup> ) | Isc (mA) | Voc (V) | Pmax (mW) | FF (%) | Eff (%) |
|---------------|------------|------------------------------------------|----------|---------|-----------|--------|---------|
| 39-2#         | Isc to Voc | 0.0905                                   | 2.32     | 1.128   | 2.23      | 85.23  | 24.66   |
|               | Voc to Isc | 0.0905                                   | 2.32     | 1.121   | 2.23      | 85.46  | 24.59   |

Supplementary information: \*(da), Designated illumination area

Test results listed in this measurement report refer exclusively to the mentioned test sample.  
The results apply only at the time of the test, and do not imply future performance.

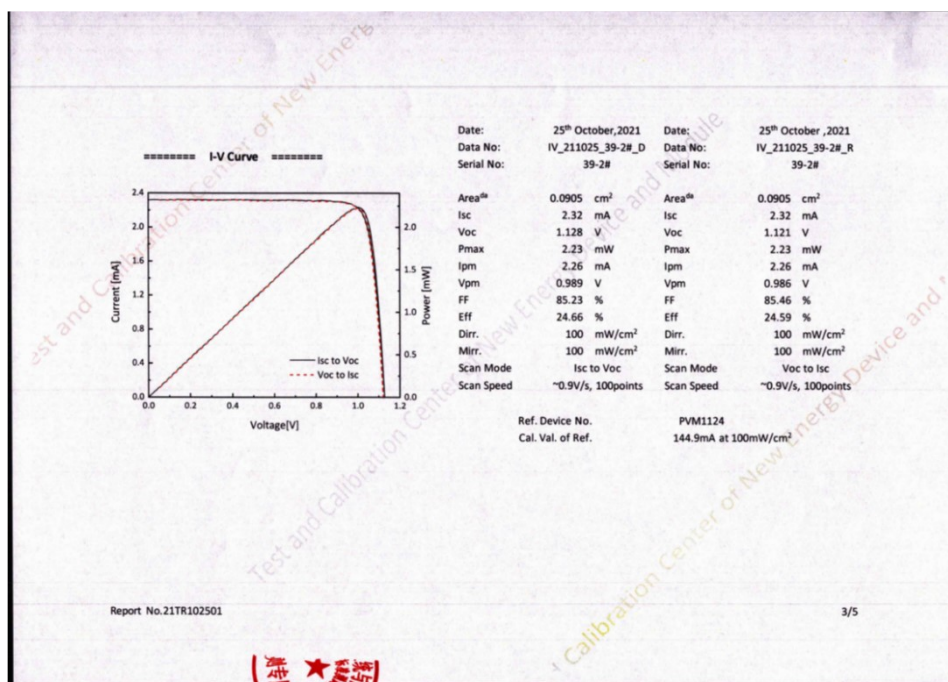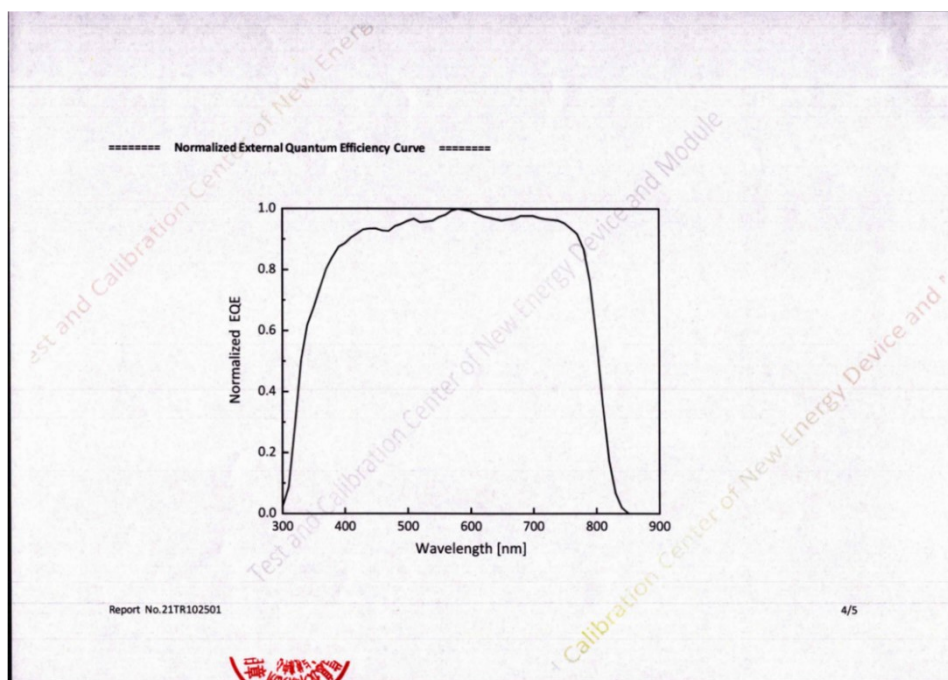

**Fig. S6** The certified performance of the target device measured at SIMIT. The device exhibits a certified PCE of 24.66% (under forward scan:  $V_{OC} = 1.128$  V,  $J_{SC} = 25.64$  mA cm<sup>-2</sup>, FF = 85.23%) and 24.59% (under reverse scan:  $V_{OC} = 1.121$  V,  $J_{SC} = 25.67$  mA cm<sup>-2</sup>, FF = 85.46%) with negligible hysteresis.

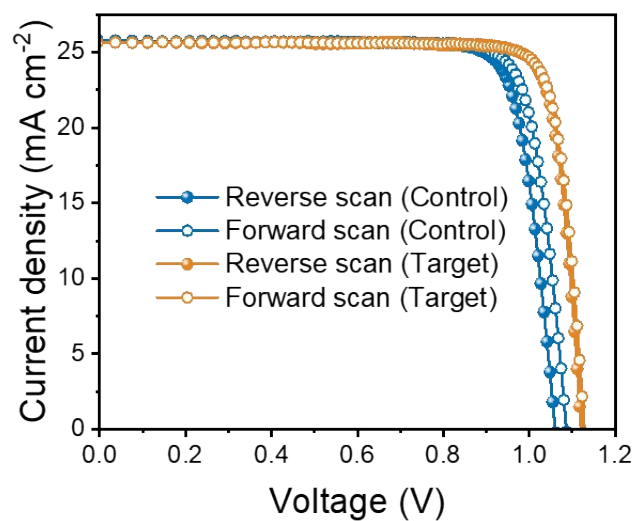

**Fig. S7**  $J$ - $V$  curves in reverse and forward scans of the control and target devices.

**Table S3** Detailed photovoltaic parameters of the  $J$ - $V$  curves in reverse and forward scans for the control and target devices.

| Devices | Scan direction | $V_{oc}$ (V) | $J_{sc}$ (mA cm <sup>-2</sup> ) | $FF$ (%) | PCE (%) | HI <sup>a</sup> (%) |
|---------|----------------|--------------|---------------------------------|----------|---------|---------------------|
| Control | Reverse        | 1.060        | 25.78                           | 82.44    | 22.53   | -2.5                |
|         | Forward        | 1.086        | 25.76                           | 82.53    | 23.09   |                     |
| Target  | Reverse        | 1.121        | 25.67                           | 85.46    | 24.59   | -0.3                |
|         | Forward        | 1.128        | 25.64                           | 85.23    | 24.66   |                     |

<sup>a</sup> HI: hysteresis index.  $HI = (PCE_{Reverse} - PCE_{Forward})/PCE_{Reverse}$

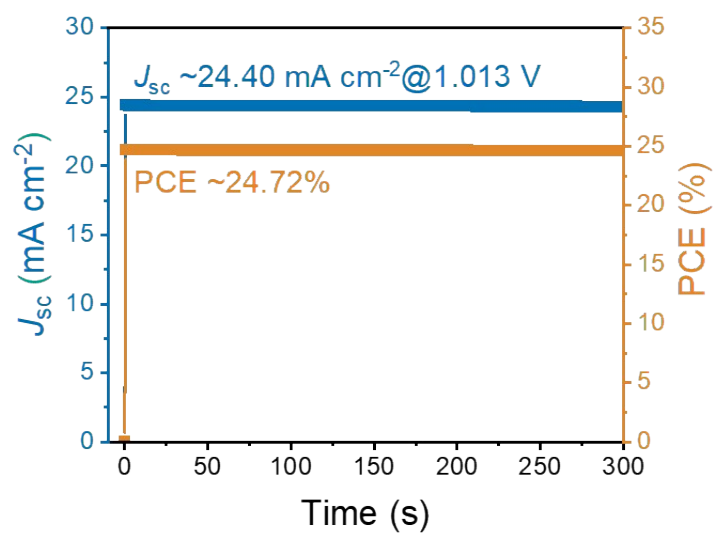

**Fig. S8** The stabilized photocurrent and power output of the target device measured at the maximum power point.

**S3. Comparison of FF and PCE obtained in this work with those reported in literatures.**

**Table S4** Comparison of FF and PCE of devices obtained in this work with those reported in literatures with PCE exceeding 24.5%.

| Device structure                                                                                                                                                                        | $V_{oc}$ (V) | $J_{sc}$ (mA cm <sup>-2</sup> ) | FF (%) | PCE (%) | Ref.      |
|-----------------------------------------------------------------------------------------------------------------------------------------------------------------------------------------|--------------|---------------------------------|--------|---------|-----------|
| FTO/c-TiO <sub>2</sub> /mp-TiO <sub>2</sub> /FAPbI <sub>3</sub> /spiro-mF/Au                                                                                                            | 1.164        | 26.35                           | 80.9   | 24.82   | S1        |
| FTO/c-TiO <sub>2</sub> /mp-TiO <sub>2</sub> /FA <sub>0.95</sub> MA <sub>0.05</sub> PbI <sub>3</sub> /spiro-OMeTAD/Au                                                                    | 1.189        | 26.35                           | 81.7   | 25.59   | S2        |
| FTO/c-TiO <sub>2</sub> /mp-TiO <sub>2</sub> /FAPbI <sub>3</sub> :3.8mol% MDACl <sub>2</sub> /spiro-OMeTAD/Au                                                                            | 1.14         | 26.5                            | 81.77  | 24.66   | S3        |
| FTO/c-TiO <sub>2</sub> /mp-TiO <sub>2</sub> /(FAPbI <sub>3</sub> ) <sub>0.97</sub> (MDA <sub>0.5</sub> Cs <sub>0.5</sub> ) <sub>0.03</sub> /spiro-OMeTAD/Au                             | 1.168        | 26.23                           | 82.15  | 25.17   | S4        |
| ITO/PTAA/Cs <sub>0.05</sub> (FA <sub>0.98</sub> MA <sub>0.02</sub> ) <sub>0.95</sub> Pb(I <sub>0.98</sub> Br <sub>0.02</sub> ) <sub>3</sub> /FcTc <sub>2</sub> /C <sub>60</sub> /BCP/Ag | 1.184        | 25.68                           | 82.32  | 25.0%   | S5        |
| FTO/c-TiO <sub>2</sub> /mp-TiO <sub>2</sub> /FAPbI <sub>3</sub> /Spiro-OMeTAD/Au                                                                                                        | 1.150        | 25.86                           | 82.37  | 24.50   | S6        |
| FTO/c-TiO <sub>2</sub> /mp-TiO <sub>2</sub> /FAPbI <sub>3</sub> /spiro-OMeTAD/Au                                                                                                        | 1.171        | 26.17                           | 82.47  | 25.28   | S7        |
| FTO/SnO <sub>2</sub> /FA <sub>x</sub> MA <sub>1-x</sub> PbI <sub>3-z</sub> Br <sub>z</sub> /spiro-MeOTAD/Ag                                                                             | 1.176        | 25.62                           | 83.15  | 25.05   | S8        |
| FTO/SnO <sub>2</sub> /FAPbI <sub>3</sub> :3.8mol% MDACl <sub>2</sub> /spiro-OMeTAD/Au                                                                                                   | 1.189        | 25.74                           | 83.2   | 25.5    | S9        |
| FTO/SnO <sub>2</sub> /FA <sub>0.95</sub> Cs <sub>0.05</sub> PbI <sub>3</sub> /spiro-OMeTAD/Au                                                                                           | 1.144        | 26.14                           | 83.5   | 24.98   | S10       |
| FTO/SnO <sub>2</sub> /(FAPbI <sub>3</sub> ) <sub>0.95</sub> (MAPbBr <sub>3</sub> ) <sub>0.05</sub> /P3HT/Au                                                                             | 1.15         | 25.5                            | 83.8   | 24.6    | S11       |
| FTO/c-TiO <sub>2</sub> /mp-TiO <sub>2</sub> /QD-SnO <sub>2</sub> /FAPbI <sub>3</sub> /Spiro-OMeTAD/Au                                                                                   | 1.176        | 26.09                           | 83.84  | 25.72   | S12       |
| FTO/SnO <sub>2</sub> /(FAPbI <sub>3</sub> ) <sub>0.95</sub> (MAPbBr <sub>3</sub> ) <sub>0.05</sub> /(BA) <sub>2</sub> PbI <sub>4</sub> /spiro-OMeTAD/Au                                 | 1.183        | 24.67                           | 84.22  | 24.63   | S13       |
| FTO/SnO <sub>2</sub> /FA <sub>0.97</sub> MA <sub>0.03</sub> PbI <sub>2.91</sub> Br <sub>0.09</sub> /spiro-OMeTAD/Au                                                                     | 1.158        | 25.25                           | 84.3   | 24.7    | S14       |
| ITO/SnO <sub>2</sub> /FA <sub>x</sub> MA <sub>1-x</sub> PbI <sub>3-z</sub> Br <sub>z</sub> /spiro-OMeTAD/Au                                                                             | 1.195        | 24.9                            | 84.3   | 25.1    | S15       |
| FTO/SnO <sub>2</sub> /FAPbI <sub>3</sub> :0.8mol% MAPbBr <sub>3</sub> /spiro-OMeTAD/Au                                                                                                  | 1.194        | 25.09                           | 84.7   | 25.4    | S16       |
| FTO/SnO <sub>2</sub> /FAPbI <sub>3</sub> :1.0mol% CsPbBr <sub>3</sub> /spiro-OMeTAD/Au                                                                                                  | 1.123        | 25.72                           | 86.90  | 25.09   | This work |

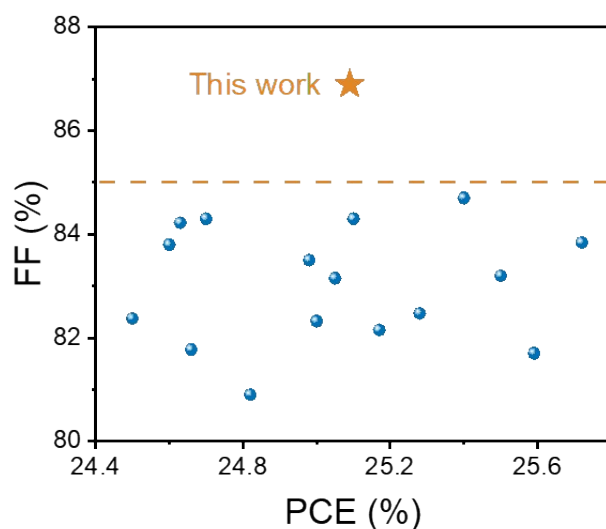

**Fig. S9** Comparison of FF and PCE of devices obtained in this work with those reported in literatures with PCE exceeding 24.5% listed in Table S4. Note that FF values reported in these literatures are all smaller than 85%.

**Table S5** Detailed parameters of GaAs and perovskite solar cells plotted in Fig. 1e.

|            | $V_{oc}$ (V) | $J_{sc}$ (mA cm <sup>-2</sup> ) | FF (%) | FF/FF <sup>SQ</sup> | PCE (%) | Ref.      |
|------------|--------------|---------------------------------|--------|---------------------|---------|-----------|
| GaAs       | 1.1272       | 29.78                           | 86.7   | 96.9%               | 29.1    | S17       |
| Perovskite | 1.189        | 26.35                           | 81.7   | 90.6%               | 25.59   | S2        |
|            | 1.184        | 25.68                           | 82.32  | 91.2%               | 25.0%   | S5        |
|            | 1.168        | 26.23                           | 82.15  | 91.5%               | 25.17   | S4        |
|            | 1.171        | 26.17                           | 82.47  | 91.7%               | 25.28   | S7        |
|            | 1.176        | 25.62                           | 83.15  | 92.1%               | 25.05   | S8        |
|            | 1.189        | 25.74                           | 83.2   | 92.7%               | 25.5    | S9        |
|            | 1.176        | 26.09                           | 83.84  | 93.0%               | 25.72   | S12       |
|            | 1.195        | 24.9                            | 84.3   | 93.5%               | 25.1    | S15       |
|            | 1.194        | 25.09                           | 84.7   | 93.8%               | 25.4    | S16       |
|            | 1.123        | 25.72                           | 86.9   | 96.3%               | 25.09   | This work |



#### S4. Stability data.

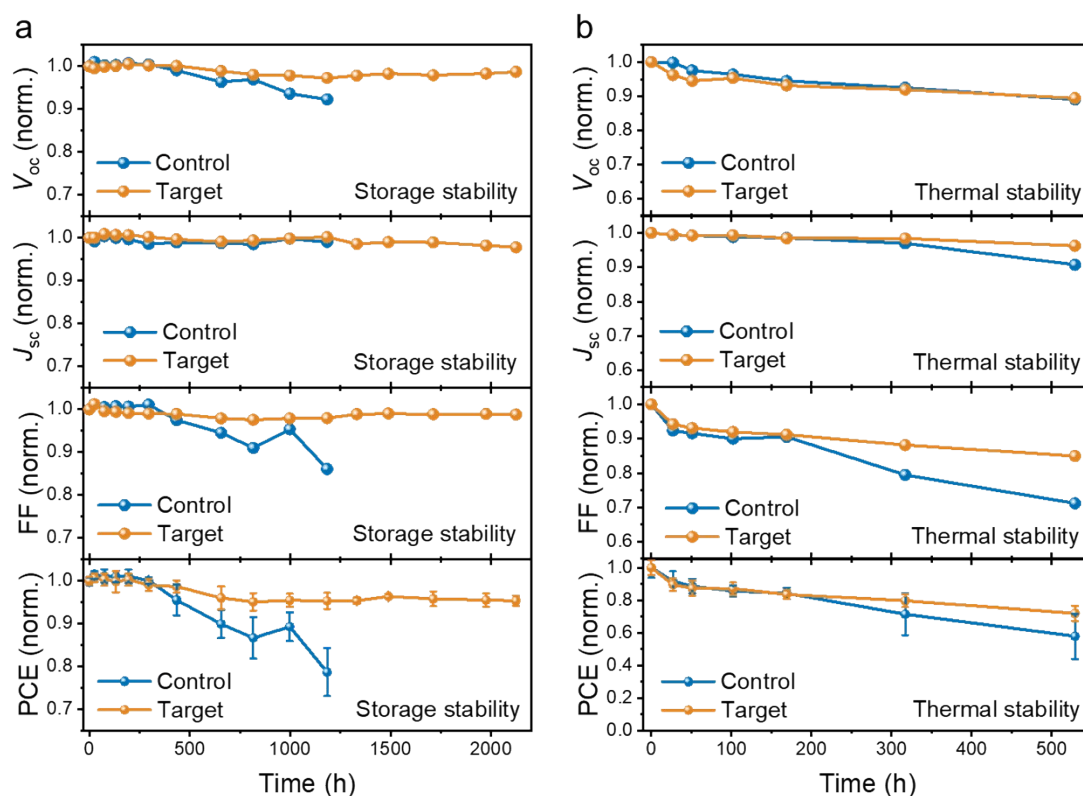

**Fig. S10 a** Normalized  $V_{OC}$ ,  $J_{SC}$ , FF and PCE of the control and target devices evolve with the storage time (stored in a dry box at room temperature and 15% relative humidity). **b** Normalized  $V_{OC}$ ,  $J_{SC}$ , FF and PCE of the control and target devices evolve with the heating time (heated at 85°C in  $N_2$  glovebox). PTAA was used to replace spiro-OMeTAD as the hole transport layer for the thermal stability measurement.

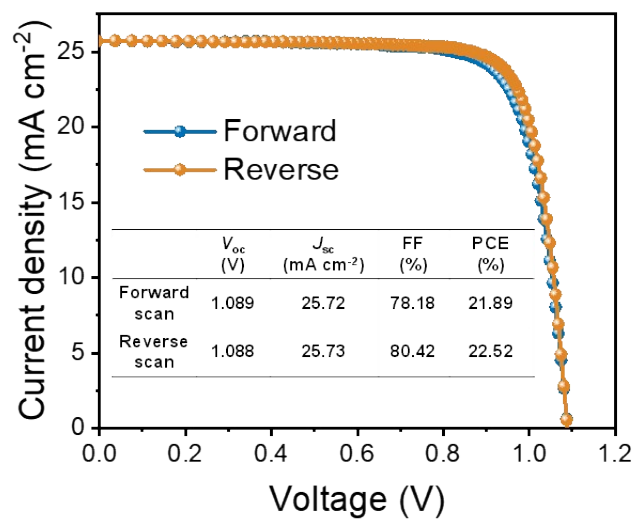

**Fig. S11**  $J$ - $V$  curves for the best-performing target devices based on PTAA HTL measured by forward and reverse scans.

### S5. XRD patterns of FAPbI<sub>3</sub> films with different amounts of CsPbBr<sub>3</sub>.

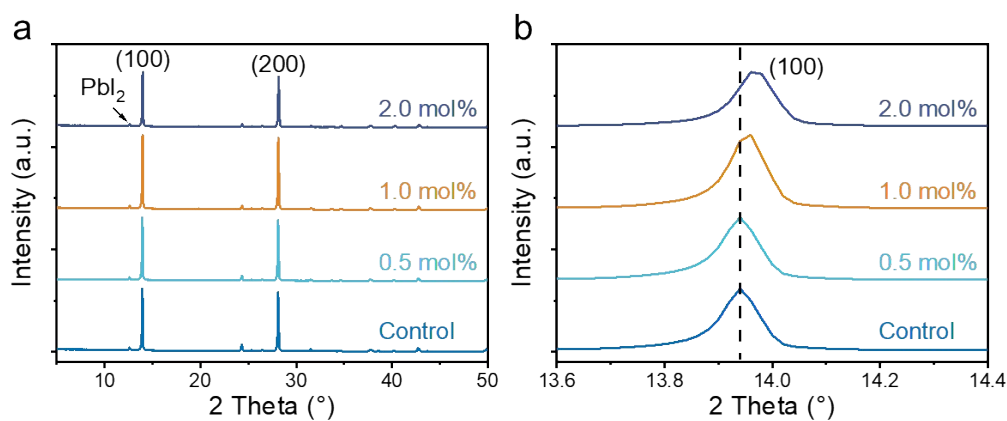

**Fig. S12** **a** XRD patterns of FAPbI<sub>3</sub> films with different amounts of CsPbBr<sub>3</sub> annealed at 120 °C for 1 hour. **b** Enlarged region between 13.6° and 14.4° in (a).

**Table S6** The diffraction parameters extracted from the XRD patterns of five samples in each case.

| $x\text{CsPbBr}_3\text{-FAPbI}_3$ | 2 Theta at (100) | FWHM at (100) |
|-----------------------------------|------------------|---------------|
| 0%                                | 13.959°±0.003°   | 0.102°±0.001° |
| 0.5%                              | 13.966°±0.007°   | 0.090°±0.002° |
| 1.0%                              | 13.977°±0.001°   | 0.086°±0.001° |
| 2.0%                              | 13.986°±0.006°   | 0.089°±0.003° |

<sup>a</sup> FWHM: full width at half maximum.

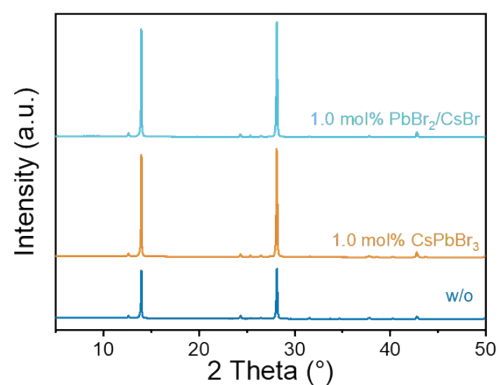

**Fig. S13** XRD patterns of FAPbI<sub>3</sub> films without and with pre-crystallized CsPbBr<sub>3</sub> and PbBr<sub>2</sub>/CsBr powder.

**Table S7** The diffraction parameters extracted from the XRD patterns (Fig. S13).

| Additive                         | 2 Theta at (100) | FWHM at (100) |
|----------------------------------|------------------|---------------|
| w/o                              | 13.957°          | 0.103°        |
| 1.0 mol% CsPbBr <sub>3</sub>     | 13.973°          | 0.090°        |
| 1.0 mol% PbBr <sub>2</sub> /CsBr | 13.973°          | 0.092°        |

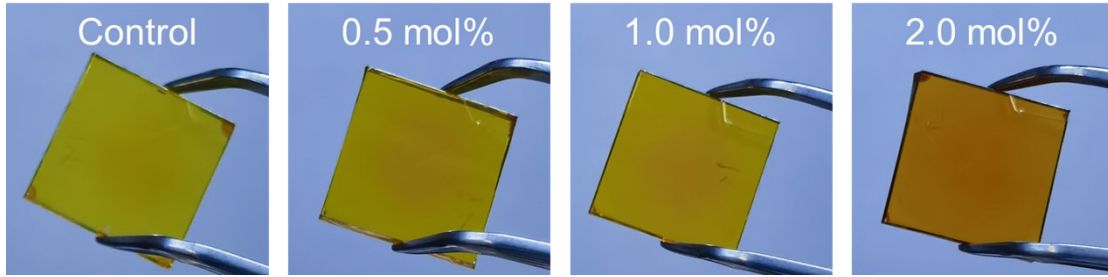

**Fig. S14** Photographs of FAPbI<sub>3</sub> films with different amounts of CsPbBr<sub>3</sub> additives immediately after anti-solvent treatment without any thermal annealing.

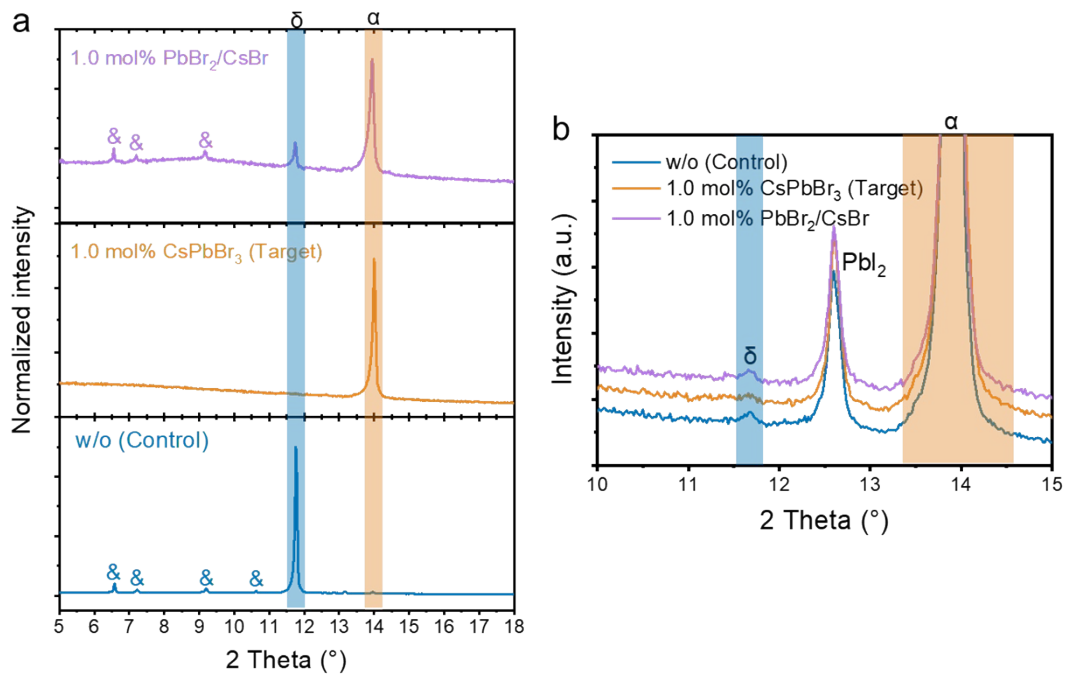

**Fig. S15 a** XRD patterns of FAPbI<sub>3</sub> (control), 1.0 mol% CsPbBr<sub>3</sub>-FAPbI<sub>3</sub> (target) and 1.0 mol% PbBr<sub>2</sub>/CsBr-FAPbI<sub>3</sub> immediately after anti-solvent treatment without any thermal annealing. **b** XRD patterns of FAPbI<sub>3</sub> (control), 1.0 mol% CsPbBr<sub>3</sub>-FAPbI<sub>3</sub> (target) and 1.0 mol% PbBr<sub>2</sub>/CsBr-FAPbI<sub>3</sub> annealed at 120 °C for 1 hour.

**S6. Geometric illustration of the crystal structure and radially integrated curves extracted from GIXRD patterns.**

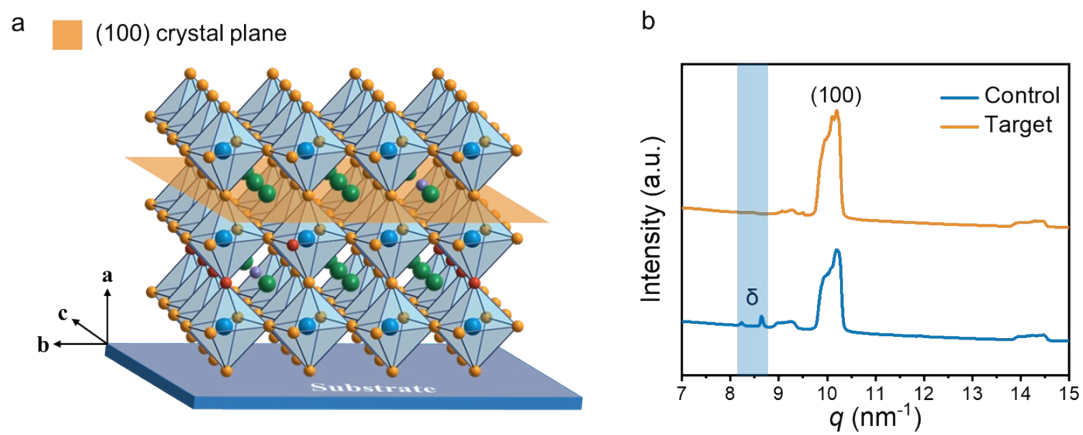

**Fig. S16 a** Geometric illustration of the crystal structure and preferred orientation of perovskite film. **b** Radially integrated curves of FAPbI<sub>3</sub> (control) and 1.0 mol% CsPbBr<sub>3</sub>-FAPbI<sub>3</sub> (target).



**S7. SEM images of FAPbI<sub>3</sub> and 1.0 mol% CsPbBr<sub>3</sub>-FAPbI<sub>3</sub> perovskite films.**

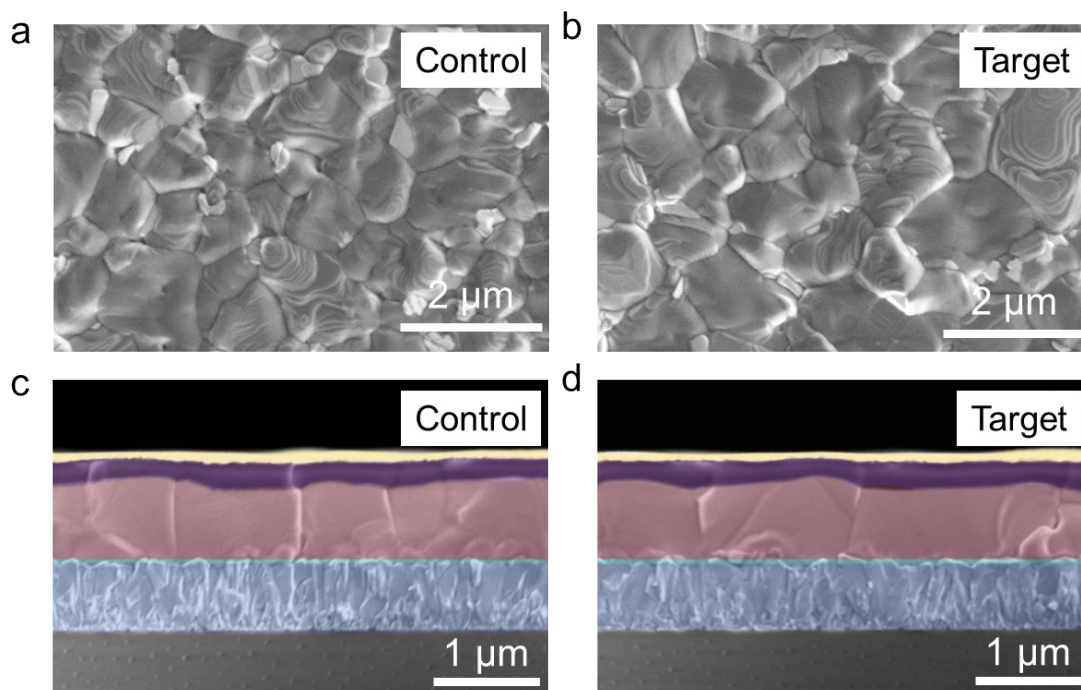

**Fig. S17** **a, b** Top surface SEM images of FAPbI<sub>3</sub> (control) and 1.0 mol% CsPbBr<sub>3</sub>-FAPbI<sub>3</sub> (target). **c, d** Cross-sectional SEM images of FAPbI<sub>3</sub> (control) and 1.0 mol% CsPbBr<sub>3</sub>-FAPbI<sub>3</sub> (target).

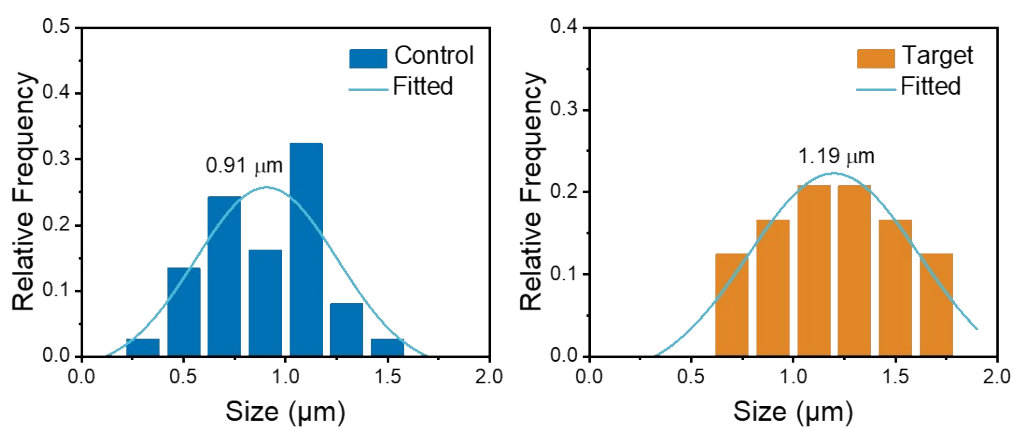

**Fig. S18** The statistic distribution of grain sizes extracted from the Fig. S17a and b.

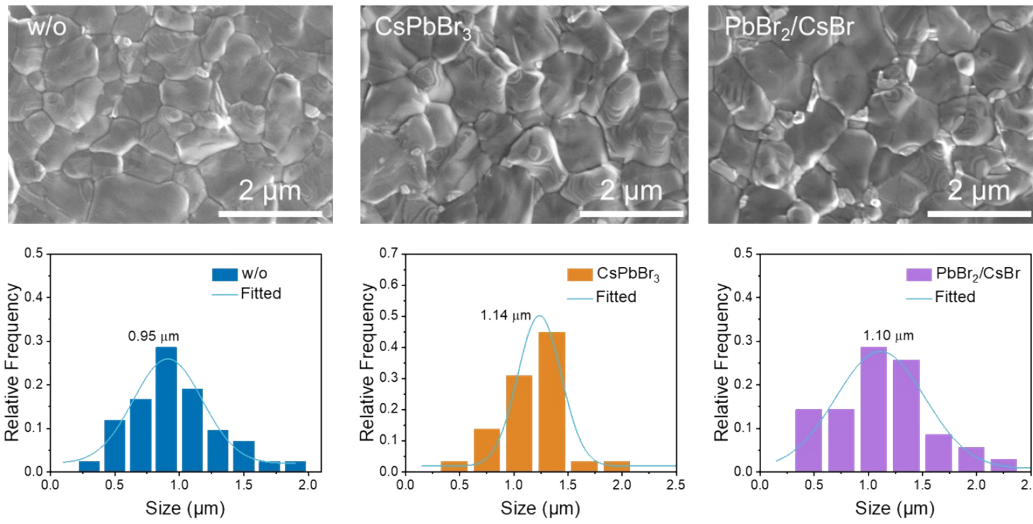

**Fig. S19** Top surface SEM images and statistic distribution of grain sizes of FAPbI<sub>3</sub> without and with pre-crystallized CsPbBr<sub>3</sub> and PbBr<sub>2</sub>/CsBr powder, respectively.

## S8. TAS at different delay times.

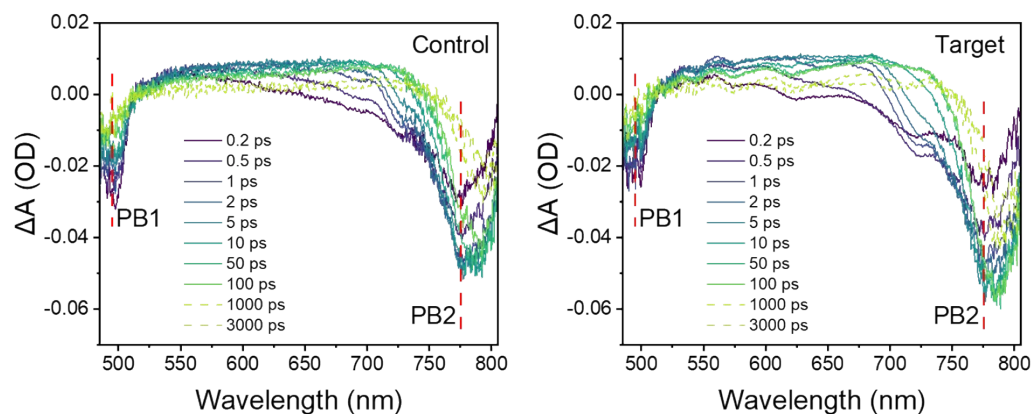

**Fig. S20** TAS of FAPbI<sub>3</sub> (control) and 1.0 mol% CsPbBr<sub>3</sub>-FAPbI<sub>3</sub> (target) films excited at 400 nm.

**Table S8** Transient absorption fitted kinetics parameters for glass/FAPbI<sub>3</sub> (control) and glass/1.0 mol% CsPbBr<sub>3</sub>-FAPbI<sub>3</sub> (target) films at 775 nm.

|         | <b>A<sub>1</sub></b> | <b>τ<sub>1</sub> (ps)</b> | <b>A<sub>2</sub></b> | <b>τ<sub>2</sub> (ps)</b> | <b>τ<sub>ave</sub> (ps)</b> |
|---------|----------------------|---------------------------|----------------------|---------------------------|-----------------------------|
| Control | 0.59                 | 286                       | 0.41                 | 3260                      | 2926                        |
| Target  | 0.57                 | 423                       | 0.43                 | 6815                      | 6329                        |

The results are fitted with the following double exponential equation:<sup>S18</sup>

$$y = y_0 + A_1 \exp\left[-\frac{t}{\tau_1}\right] + A_2 \exp\left[-\frac{t}{\tau_2}\right]$$

The average decay time is calculated through the following format:

$$\tau_{ave} = \frac{A_1 \tau_1^2 + A_2 \tau_2^2}{A_1 \tau_1 + A_2 \tau_2}$$

---

**S9. UV-vis spectra and the plots of  $(\alpha h\nu)^2$  vs energy ( $h\nu$ ) of the control and target perovskite films.**

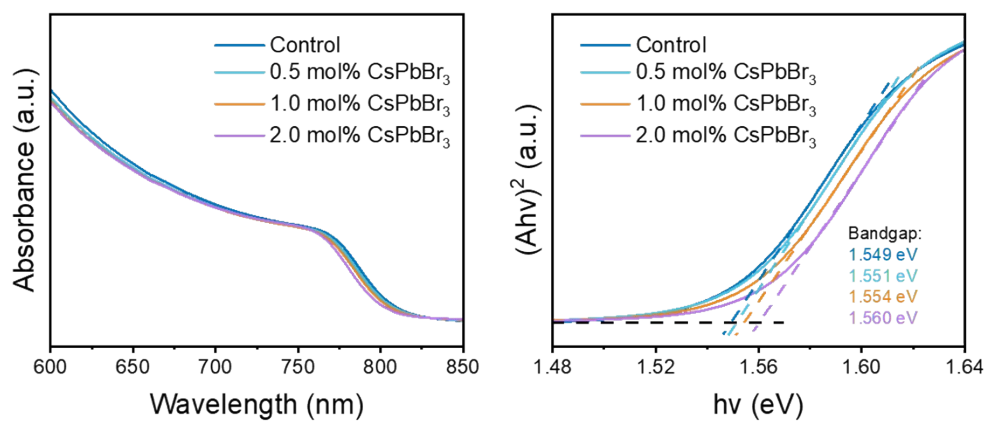

**Fig. S21** UV-vis spectra and the plots of  $(\alpha h\nu)^2$  vs energy ( $h\nu$ ) of FAPbI<sub>3</sub> (control) without and with different amount of CsPbBr<sub>3</sub> incorporation.

---

## S10. Enlarged DLTS spectra and Arrhenius plot.

DLTS uses the transient capacitance of p-n junction at different temperature as a probe to monitor the changes in charge state of a deep defect center. Traps in the device are filled by carriers through applying a voltage pulse to the device, which changes the capacitance associated with p-n junction of the device. The types of traps can be differentiated by the change of capacitance during the discharging process of traps (the hole and electron traps correspond to negative and positive  $\Delta C$ , respectively in n type films). The defect level is identified from DLTS signal using Fourier deconvolution algorithm, and Arrhenius plots are obtained from defect peaks in DLTS signal. The active energy ( $E_a$ ,  $E_C - E_T$  or  $E_T - E_V$ ) and capture cross section of electron traps and hole traps can be calculated by the Arrhenius equations S1 and S2,<sup>S19,20</sup>

$$\ln(\tau_e v_{th,n} N_C) = \frac{E_C - E_T}{k_B T} - \ln\left(\frac{v_{th,n}}{v_{th,p}} X_n \sigma_n\right) \quad (S1)$$

$$\ln(\tau_e v_{th,p} N_V) = \frac{E_T - E_V}{k_B T} - \ln\left(\frac{v_{th,p}}{v_{th,n}} X_p \sigma_p\right) \quad (S2)$$

where  $\tau_e$ ,  $N_C$ ,  $N_V$ ,  $E_C$ ,  $E_T$  and  $E_V$  are emission time constant, conduction band state density, valence band state density, conduction band, trap energy level and valence band, respectively.  $v_{th,n/p}$ ,  $X_{n/p}$  and  $\sigma_{n/p}$  represent thermal velocity, entropy factor and capture cross section for electron and hole, respectively. The  $E_a$  and  $\sigma$  can be extracted by the slope and y-axis intercept, separately. In addition, the trap density ( $N_T$ ) could be obtained by equation S3,<sup>S19</sup>

$$N_T = 2N_S \frac{\Delta C}{C_R} \quad (S3)$$

where  $N_S$  is the shallow donor concentration,  $C_R$  is the capacitance under reverse bias,

while  $\Delta C$  represents the amplitude of transient capacitance.

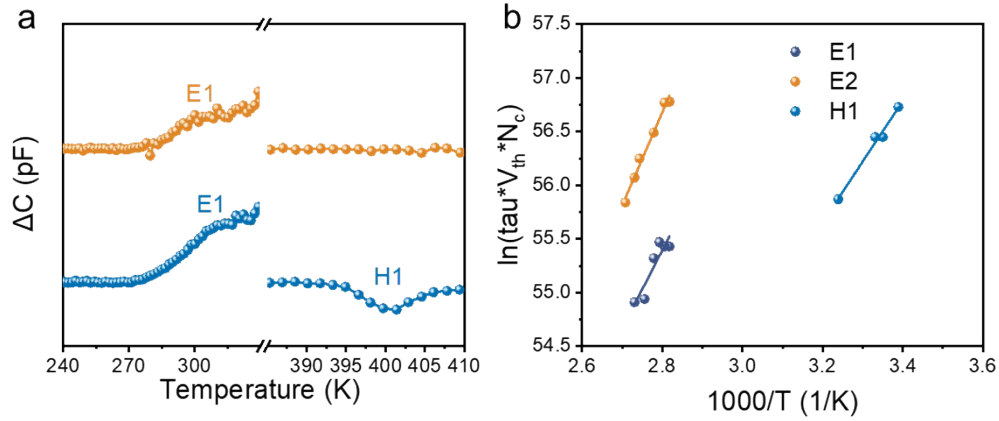

**Fig. S22** **a** Enlarged DLTS spectra of the control and target devices in Fig. 3c. **b** Arrhenius plot of control device to determine energy and capture cross section.

**Table S9** The defect parameters of control and target devices.

| Defects | $E_C - E_T^a$ (eV) | $\sigma^b$ (cm <sup>2</sup> ) | $N_T^c$ (cm <sup>-3</sup> ) | $N_S^d$ (cm <sup>-3</sup> ) |
|---------|--------------------|-------------------------------|-----------------------------|-----------------------------|
| Control | E1                 | 0.662                         | $2.263 \times 10^{-15}$     | $1.455 \times 10^{13}$      |
|         | E2                 | 0.734                         | $2.012 \times 10^{-16}$     | $2.278 \times 10^{14}$      |
|         | H1                 | 0.832                         | $5.008 \times 10^{-16}$     | $7.781 \times 10^{11}$      |
| Target  | E1                 | 0.658                         | $3.291 \times 10^{-15}$     | $4.278 \times 10^{12}$      |
|         | E2                 | 0.732                         | $1.843 \times 10^{-16}$     | $9.871 \times 10^{13}$      |

<sup>a</sup> $E_T$ : the energy level of defect; <sup>b</sup> $\sigma$ : capture cross-sections of traps; <sup>c</sup> $N_T$ : trap concentration. <sup>d</sup> $N_S$ : shallow donor concentration.



---

### S11. SCLC analysis.

Electron-only device with a structure of glass/FTO/SnO<sub>2</sub>/perovskite/[6,6]-phenyl-C<sub>61</sub>-butyric acid methyl ester (PC<sub>61</sub>BM)/Ag and hole-only device with a structure of ITO/PTAA/perovskite/spiro-OMeTAD/Au was fabricated to determine the trap density within the perovskite films. The corresponding  $I$ - $V$  curves are plotted in Fig. 2g and 2h. The linear correlation of  $I$ - $V$  characteristics at low bias voltage suggesting an ohmic response. When the bias voltage exceeds the kink point, the current increases nonlinearly, representing where the trap-states are filled completely, the corresponding bias voltage at the kink point is defined as the trap-filled limit voltage ( $V_{\text{TFL}}$ ), and the trap-state density ( $n_t$ ) can be determined through Equation S4:

$$n_t = \frac{2\varepsilon_0\varepsilon_r}{qL^2} \cdot V_{\text{TFL}} \quad (\text{S4})$$

Where  $\varepsilon_0$  is the vacuum permittivity,  $\varepsilon_r$  is the relative dielectric constant of perovskite ( $\varepsilon_r = 46.9$ ),<sup>S21</sup>  $q$  is the elementary charge of the electron, and  $L$  is the perovskite film thickness (about 750 nm estimated from the cross-sectional SEM images).  $V_{\text{TFL}}$  is the onset voltage of the trap-filled limit region.

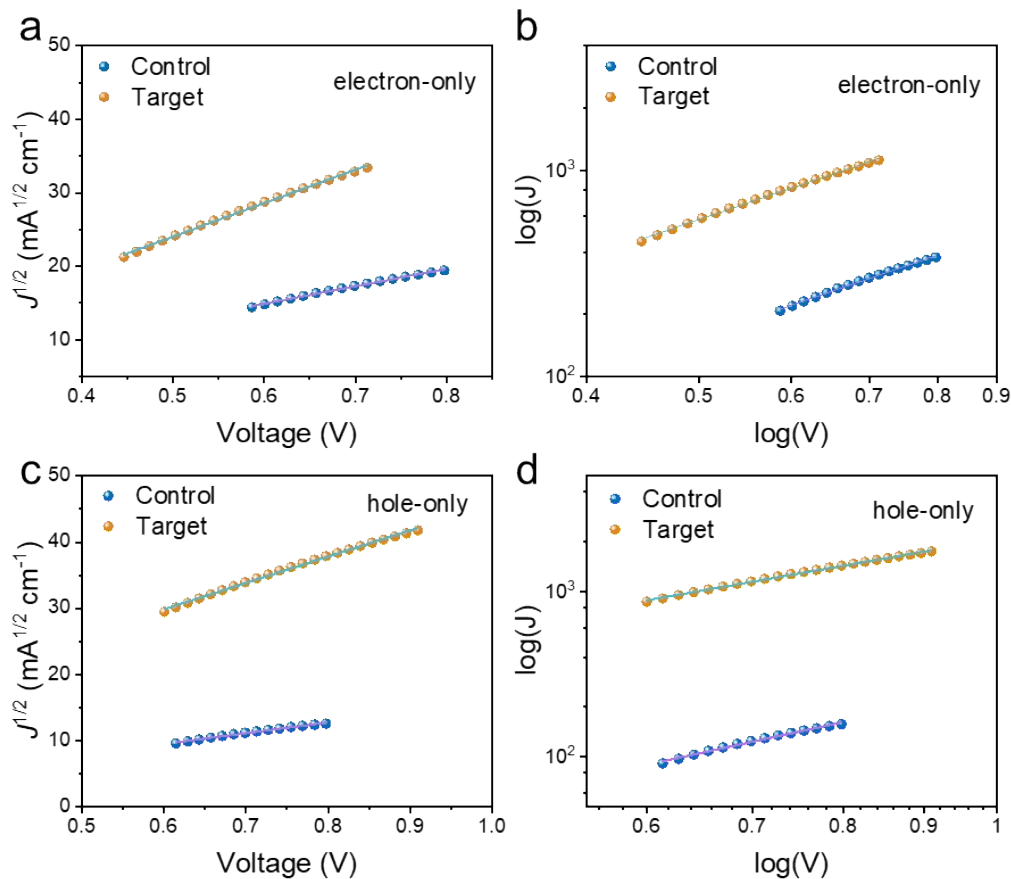

**Fig. S23**  $J$ - $V$  curves of the electron-only devices (a) (FTO/SnO<sub>2</sub>/perovskite/PC<sub>61</sub>BM/Ag) and hole-only devices (c) (ITO/PTAA/perovskite/spiro-OMeTAD/Au) in SCLC region. The log( $J$ )-log( $V$ ) plots of the devices in the SCLC region with a slope of 2 for the electron-only devices (b) and hole-only devices (d), respectively. The solid lines are fits of the data points.

**Table S10** The charge carrier mobilities obtained from the electron-only and hole-only devices.

| Device  | Mobility ( $10^{-3} \text{ cm}^2 \text{ V}^{-1} \text{ s}^{-1}$ ) |      | $\mu_e/\mu_h$ |
|---------|-------------------------------------------------------------------|------|---------------|
|         | Electron                                                          | Hole |               |
| Control | 5.1                                                               | 2.4  | 2.1           |
| Target  | 18.7                                                              | 14.3 | 1.3           |

---

The carrier mobilities are obtained according to the SCLC regions, the dark current is fitted by Mott-Gurney law:

$$J = \frac{9\varepsilon\varepsilon_0\mu}{8L^3}V^2 \quad (\text{S5})$$

Where the  $J$  is current density and  $\mu$  is carrier mobility. According to equation S5, the calculated  $\mu_h$  are  $2.4 \times 10^{-3}$  and  $14.3 \times 10^{-3} \text{ cm}^2 \text{ V}^{-1} \text{ s}^{-1}$  for control and target perovskite films, respectively. And the calculated  $\mu_e$  are  $5.1 \times 10^{-3}$  and  $18.7 \times 10^{-3} \text{ cm}^2 \text{ V}^{-1} \text{ s}^{-1}$  for control and target perovskite films, respectively.

## **S12. EIS analysis.**

From the Nyquist plot (Fig. S24), the impedance spectra were fitted with one R-CPE arcs, which a resistor  $R_s$  (series resistance) connects with an R-CPE elements.  $R_s$  is determined by the starting point at the real part of the Nyquist plot. The  $R_{ct}$  (charge transport resistance) is related to the charge transfer dynamics of devices, CPE is the non-ideal chemical capacitances. According to the fitting data in Table S11, after CsPbBr<sub>3</sub> incorporating the  $R_s$  value decreases from 14.21 to 11.31  $\Omega$ , and  $R_{ct}$  value also decreases from 380.7 to 276.7  $\Omega$ .

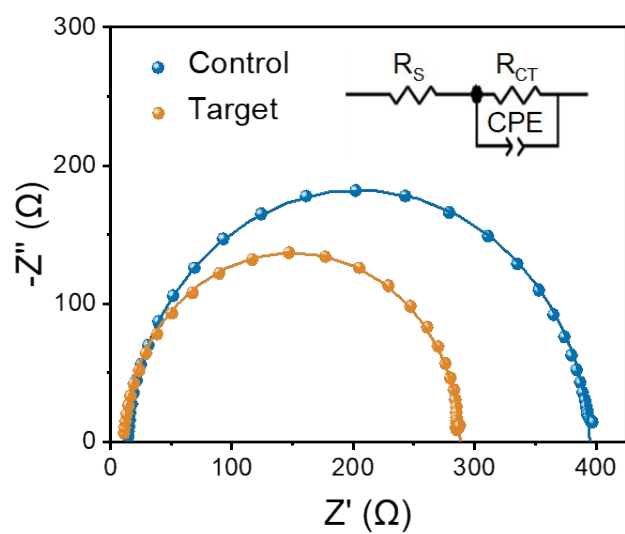

**Fig. S24** Nyquist plots of the control and target devices. Inset: the equivalent circuit model employed for the fitting of the impedance spectra.

**Table S11** Parameters employed for the fitting of the impedance spectra of control and target devices.

| Device  | $R_s$ ( $\Omega$ ) | $R_{ct}$ ( $\Omega$ ) | CPE-T (F) | CPE-P (F) |
|---------|--------------------|-----------------------|-----------|-----------|
| Control | 14.21              | 380.7                 | 1.22E-8   | 0.97      |
| Target  | 11.31              | 276.7                 | 1.15E-8   | 0.99      |

### S13. Dark $J$ - $V$ curves of the control and target devices.

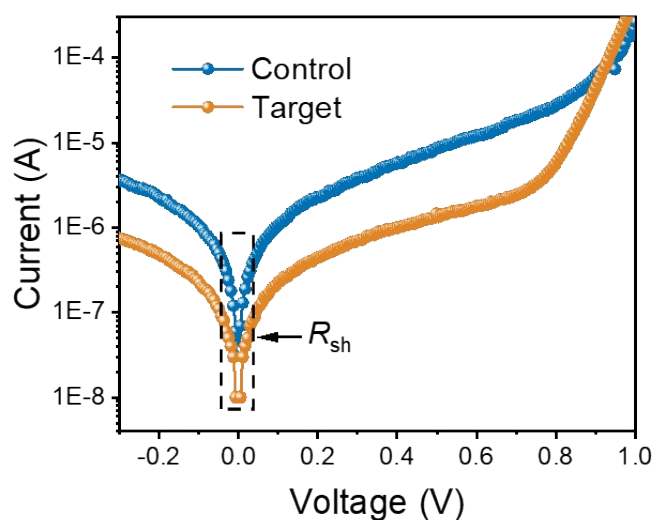

**Fig. S25** Dark  $J$ - $V$  curves of the control and target devices.

### S14. FF loss analysis.

Recombination currents and ohmic resistances have a deep influence on the FF of solar cells. To account for these effects, the two-diode model of solar cells, which includes two diodes with saturation current densities  $J_{01}$ ,  $J_{02}$  and ohmic resistors  $R_s$ ,  $R_{sh}$  in series and parallel to the diodes, is usually used.<sup>S22</sup>

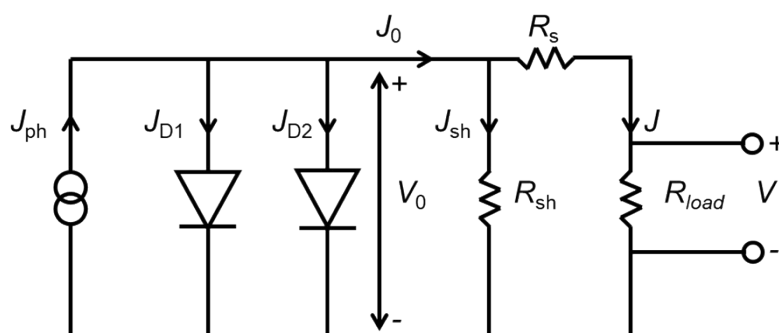

**Fig. S26** Schematic of the two-diode model of a solar cell.

A practical upper limit of fill factor ( $FF_{J01}$ ) is determined by assuming the absence of  $R_s$ ,  $R_{sh}$  and  $J_{02}$ .

$$J = J_{ph} - J_{01} \left[ \exp\left(\frac{qV}{k_B T}\right) - 1 \right] \quad (S6)$$

At open-circuit condition,  $J = 0$  and  $V = V_{oc}$ . At short-circuit condition,  $J = J_{sc}$ ,  $V = 0$ .

The equation S6 could be converted into equation S7.

$$J = J_{sc} - \frac{J_{sc}}{\exp\left(\frac{qV_{oc}}{k_B T}\right) - 1} \left[ \exp\left(\frac{qV}{k_B T}\right) - 1 \right] \quad (S7)$$

$$FF_{J01} = \frac{J_{01} V_{01}}{J_{sc} V_{oc}} \quad (S8)$$

According to the above equations, the calculated  $FF_{J01}$  are 89.0% and 89.2% for control and target devices.

Considering the two-diode model at MPP, the terminal voltage and current density will be related to  $R_s$  and  $R_{sh}$ .

$$V_{mpp} = V_0 - J_{mpp} R_s \quad (S9)$$

$$J_{mpp} = J_0 - (V_{mpp} + J_{mpp} R_s) / R_{sh} \quad (S10)$$

Thus,

$$\frac{V_0 J_0}{V_{oc} J_{sc}} = \frac{V_{mpp} J_{mpp}}{V_{oc} J_{sc}} + \frac{J_{mpp}^2 R_s}{V_{oc} J_{sc}} + \frac{(V_{mpp} + J_{mpp} R_s)^2}{R_{sh} V_{oc} J_{sc}} \quad (S11)$$

where  $\frac{V_{mpp} J_{mpp}}{V_{oc} J_{sc}}$  is the FF,  $\frac{J_{mpp}^2 R_s}{V_{oc} J_{sc}}$  is the  $\Delta FF_{R_s}$  and  $\frac{(V_{mpp} + J_{mpp} R_s)^2}{R_{sh} V_{oc} J_{sc}}$  is the  $\Delta FF_{R_{sh}}$ .

The FF loss due to  $J_{02}$  recombination can be obtained according to the following equation S12.

$$\Delta FF_{J02 \text{ recombination}} = FF_{J01} - \Delta FF_{R_s} - \Delta FF_{R_{sh}} - FF \quad (S12)$$

$R_s$  and  $R_{sh}$  need to be measured to calculate the  $\Delta FF_{R_s}$  and  $\Delta FF_{R_{sh}}$ . After that, three terms of FF loss could be obtained.

$R_s$  at MPP was determined from the voltage shift at  $J_{mpp}$  between the one sun  $J-V$  curve and pseudo  $J-V$  curve (Fig. 4e). Pseudo  $J-V$  curves were obtained by measuring the  $J-V$  curve at different light intensities and then converting the  $J_{sc}-V_{oc}$  pairs into pseudo  $J-V$  curves using Equation S13,<sup>S23</sup>

$$J(V_{oc}) = J_{sc}^{one\ sun} \left[ 1 - \frac{J_{sc}^{filtered}(V_{oc})}{J_{sc}^{one\ sun}} \right] \quad (S13)$$

$R_{sh}$  was determined by the inverse of the slope of a linear fit of the dark  $J-V$  in the range 0-50 mV (Fig. S25).

The corresponding values are summarized in Table S12.

**Table S12** The one sun  $J-V$  data and FF analysis results.

| Device  | $V_{oc}$ (V)                                 | $J_{sc}$ (mA cm <sup>-2</sup> )       | FF (%)                | PCE (%)           | $V_{mpp}$ (V)        | $J_{mpp}$ (mA cm <sup>-2</sup> ) |
|---------|----------------------------------------------|---------------------------------------|-----------------------|-------------------|----------------------|----------------------------------|
| Control | 1.087                                        | 25.75                                 | 83.47                 | 23.37             | 0.952                | 24.54                            |
| Target  | 1.123                                        | 25.72                                 | 86.90                 | 25.09             | 1.014                | 24.75                            |
| Device  | $R_s$ at MPP<br>( $\Omega$ cm <sup>2</sup> ) | $R_{sh}$ ( $\Omega$ cm <sup>2</sup> ) | FF <sub>J01</sub> (%) | $\Delta FF_{R_s}$ | $\Delta FF_{R_{sh}}$ | $\Delta FF_{J02}$                |
|         |                                              |                                       |                       | (% absolute)      |                      |                                  |
| Control | 1.2                                          | $2.8 \times 10^3$                     | 89.0                  | 2.58              | 1.23                 | 1.72                             |
| Target  | 0.6                                          | $6.2 \times 10^3$                     | 89.2                  | 1.27              | 0.59                 | 0.58                             |

---

## References

- S1. M. Jeong, I. W. Choi, E. M. Go, Y. Cho, M. Kim, B. Lee, S. Jeong, Y. Jo, H. W. Choi, J. Lee, J.-H. Bae, S. K. Kwak, D. S. Kim and C. Yang, *Science*, 2020, **369**, 1615-1620.
- S2. J. Jeong, M. Kim, J. Seo, H. Lu, P. Ahlawat, A. Mishra, Y. Yang, M. A. Hope, F. T. Eickemeyer, M. Kim, Y. J. Yoon, I. W. Choi, B. P. Darwich, S. J. Choi, Y. Jo, J. H. Lee, B. Walker, S. M. Zakeeruddin, L. Emsley, U. Rothlisberger, A. Hagfeldt, D. S. Kim, M. Grätzel and J. Y. Kim, *Nature*, 2021, **592**, 381-385.
- S3. H. Min, M. Kim, S.-U. Lee, H. Kim, G. Kim, K. Choi, J. H. Lee and S. I. Seok, *Science*, 2019, **366**, 749-753.
- S4. G. Kim, H. Min, K. S. Lee, D. Y. Lee, S. M. Yoon and S. I. Seok, *Science*, 2020, **370**, 108-112.
- S5. Z. Li, B. Li, X. Wu, S. A. Sheppard, S. F. Zhang, D. P. Gao, N. J. Long and Z. L. Zhu, *Science*, 2022, **376**, 416-420.
- S6. L. Zhao, Q. Li, C. H. Hou, S. Li, X. Yang, J. Wu, S. Zhang, Q. Hu, Y. Wang, Y. Zhang, Y. Jiang, S. Jia, J. J. Shyue, T. P. Russell, Q. Gong, X. Hu and R. Zhu, *J. Am. Chem. Soc.*, 2022, **144**, 1700-1708.
- S7. M. Kim, I.-w. Choi, S. J. Choi, J. W. Song, S.-I. Mo, J.-H. An, Y. Jo, S. Ahn, S. K. Ahn, G.-H. Kim and D. S. Kim, *Joule*, 2021, **5**, 659-672.
- S8. X. Luo, Z. Shen, Y. Shen, Z. Su, X. Gao, Y. Wang, Q. Han and L. Han, *Adv. Mater.*, 2022, DOI: 10.1002/adma.202202100, 2202100.
- S9. H. Min, D. Y. Lee, J. Kim, G. Kim, K. S. Lee, J. Kim, M. J. Paik, Y. K. Kim, K. S. Kim, M. G. Kim, T. J. Shin and S. I. Seok, *Nature*, 2021, **598**, 444-450.
- S10. S.-H. Lee, S. Jeong, S. Seo, H. Shin, C. Ma and N.-G. Park, *ACS Energy Lett.*, 2021, **6**, 1612-1621.
- S11. M. J. Jeong, K. M. Yeom, S. J. Kim, E. H. Jung and J. H. Noh, *Energy Environ. Sci.*, 2021, **14**, 2419-2428.
- S12. M. Kim, J. Jeong, H. Lu, T. K. Lee, F. T. Eickemeyer, Y. Liu, I. W. Choi, S. J. Choi, Y. Jo, H.-B. Kim, S.-I. Mo, Y.-K. Kim, H. Lee, N. G. An, S. Cho, W. R. Tress, S. M. Zakeeruddin, A. Hagfeldt, J. Y. Kim, M. Grätzel and D. S. Kim, *Science*, 2022, **375**, 302-306.
- S13. Y.-W. Jang, S. Lee, K. M. Yeom, K. Jeong, K. Choi, M. Choi and J. H. Noh, *Nat. Energy*, 2021, **6**, 63-71.
- S14. F. Zhang, S. Y. Park, C. Yao, H. Lu, S. P. Dunfield, C. Xiao, S. Uličná, X. Zhao, L. D. Hill, X. Chen, X. Wang, L. E. Mundt, K. H. Stone, L. T. Schelhas, G. Teeter, S. Parkin, E. L. Ratcliff, Y.-L. Loo, J. J. Berry, M. C. Beard, Y. Yan, B. W. Larson and K. Zhu, *Science*, 2022, **375**, 71-76.
- S15. Z. Shen, Q. Han, X. Luo, Y. Shen, T. Wang, C. Zhang, Y. Wang, H. Chen, X. Yang, Y. Zhang and L. Han, *Energy Environ. Sci.*, 2022, **15**, 1078-1085.
- S16. J. J. Yoo, G. Seo, M. R. Chua, T. G. Park, Y. Lu, F. Rotermund, Y. K. Kim, C. S. Moon, N. J. Jeon, J. P. Correa-Baena, V. Bulovic, S. S. Shin, M. G. Bawendi and J. Seo, *Nature*, 2021, **590**, 587-593.



- 
- S17. M. A. Green, E. D. Dunlop, J. Hohl - Ebinger, M. Yoshita, N. Kopidakis and X. Hao, *Prog. Photovoltaics*, 2021, **30**, 3-12.
- S18. J. Zhang, L. Wang, C. Jiang, B. Cheng, T. Chen and J. Yu, *Adv. Sci.*, 2021, **8**, 2102648.
- S19. W. Lian, C. Jiang, Y. Yin, R. Tang, G. Li, L. Zhang, B. Che and T. Chen, *Nat. Commun.*, 2021, **12**, 3260.
- S20. W. P. Hu, X. He, Z. M. Fang, W. T. Lian, Y. B. Shang, X. C. Li, W. R. Zhou, M. M. Zhang, T. Chen, Y. L. Lu, L. J. Zhang, L. M. Ding and S. F. Yang, *Nano Energy*, 2020, **68**, 104362.
- S21. W. Hu, W. Zhou, X. Lei, P. Zhou, M. Zhang, T. Chen, H. Zeng, J. Zhu, S. Dai, S. Yang and S. Yang, *Adv. Mater.*, 2019, **31**, 1806095.
- S22. A. Khanna, T. Mueller, R. A. Stangl, B. Hoex, P. K. Basu and A. G. Aberle, *IEEE J. Photovolt.*, 2013, **3**, 1170-1177.
- S23. N. Mundhaas, Z. S. J. Yu, K. A. Bush, H. P. Wang, J. Hausele, S. Kavadiya, M. D. McGehee and Z. C. Holman, *Sol. RRL*, 2019, **3**, 1800378.
